# Supplementary material for: Inhibin/activin expression in human and rodent liver: subunits α and βB as new players in human hepatocellular carcinoma?
Source: PubMed Central journal article supplement (PMC3078591; doi:10.1038/bjc.2011.53), 2011-03-15

# Suppl. Figure 1

**A**

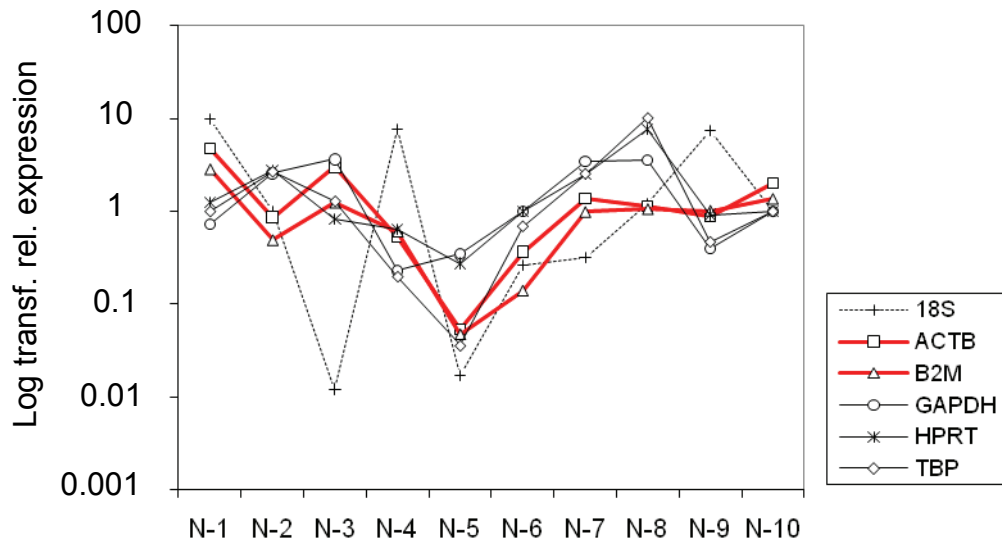

**B**

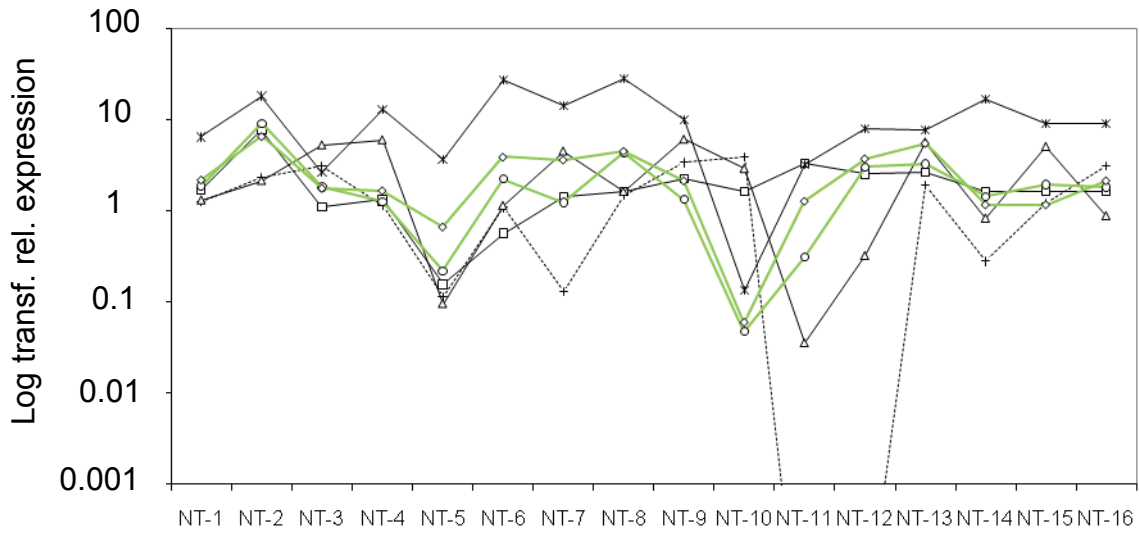

**C**

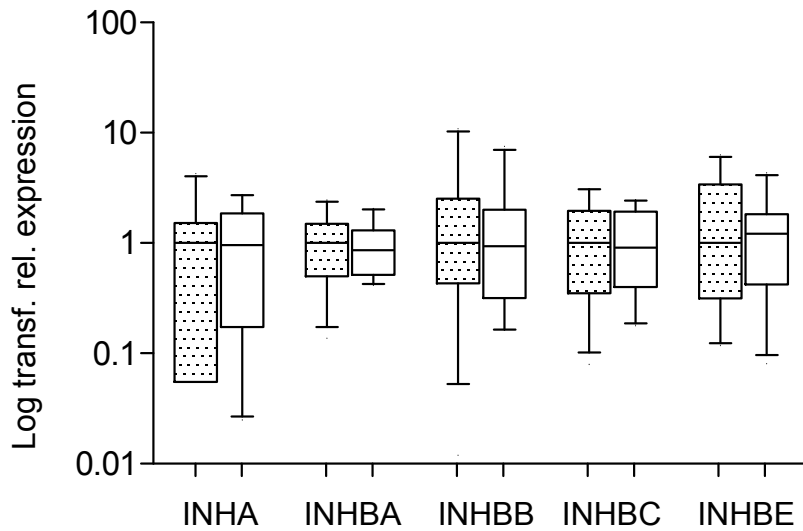

Suppl. Figure 2

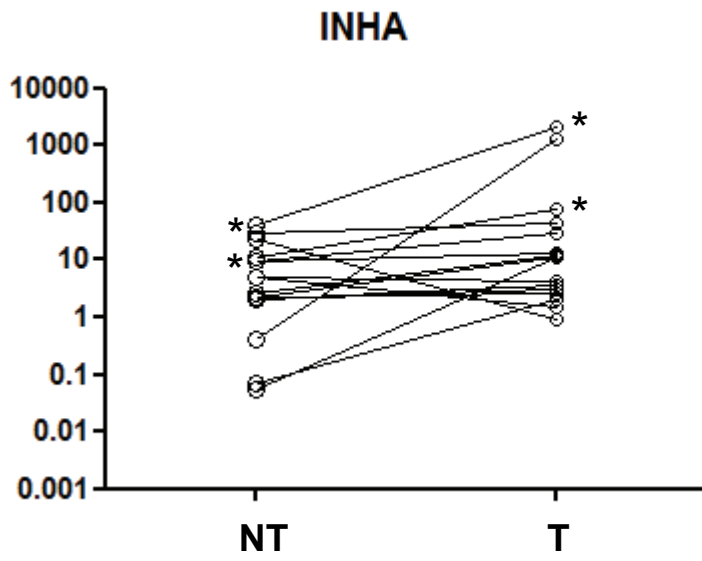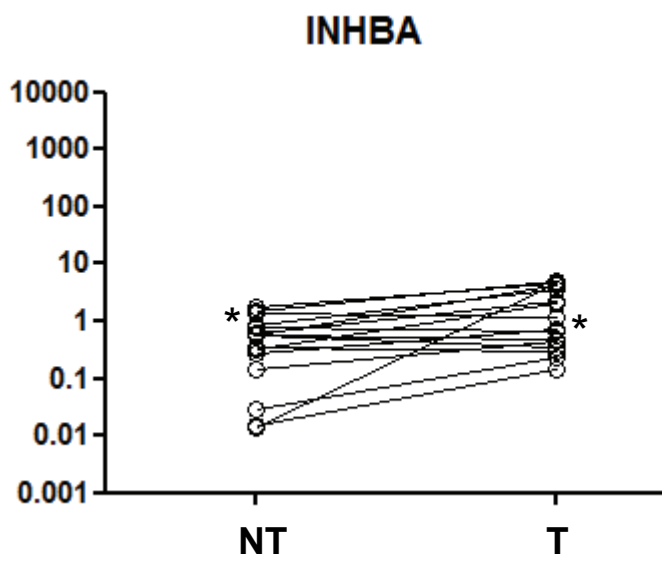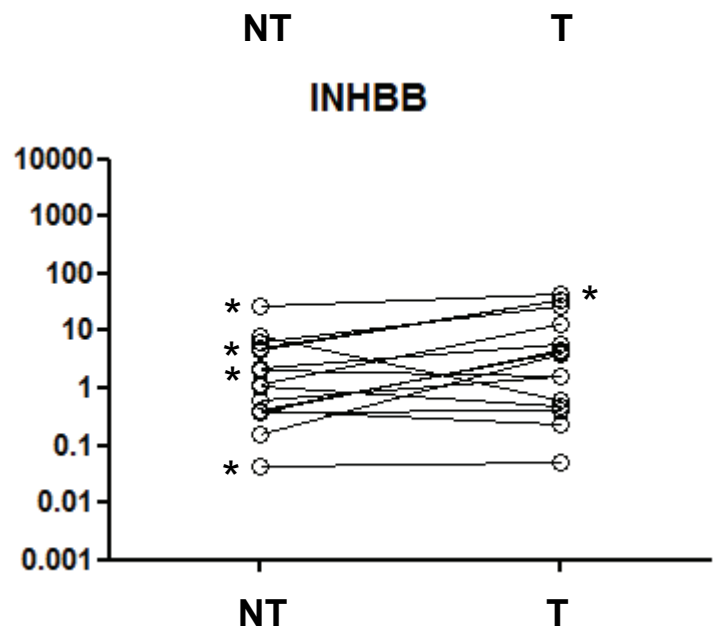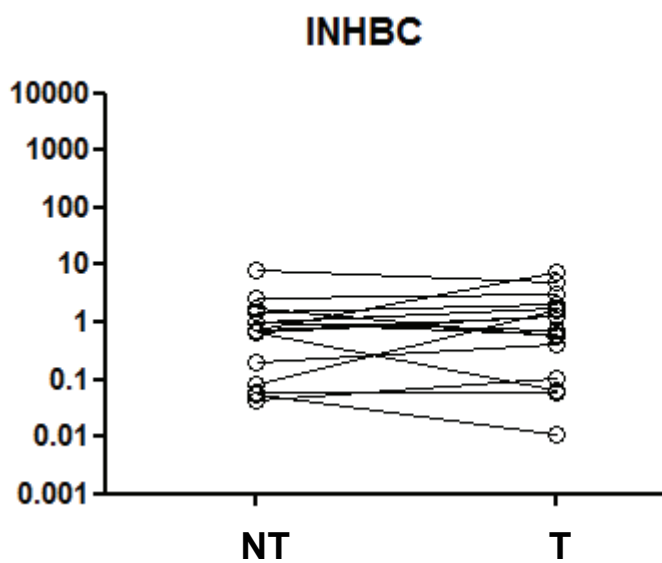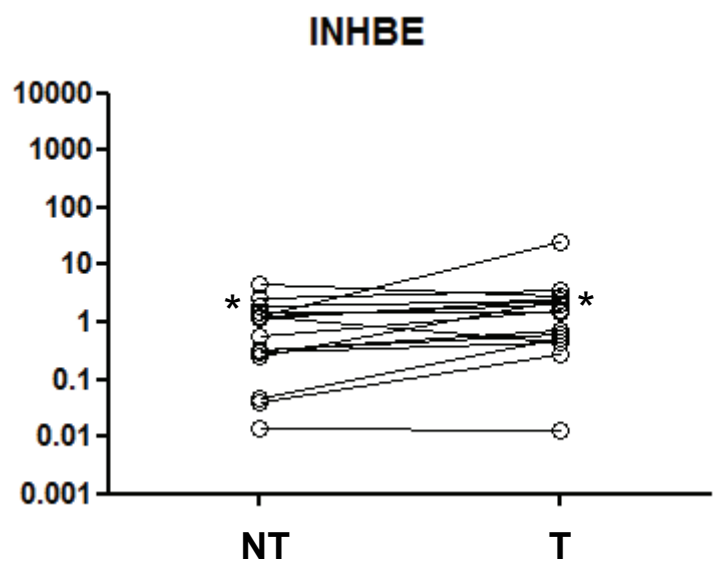

Suppl. Figure 3

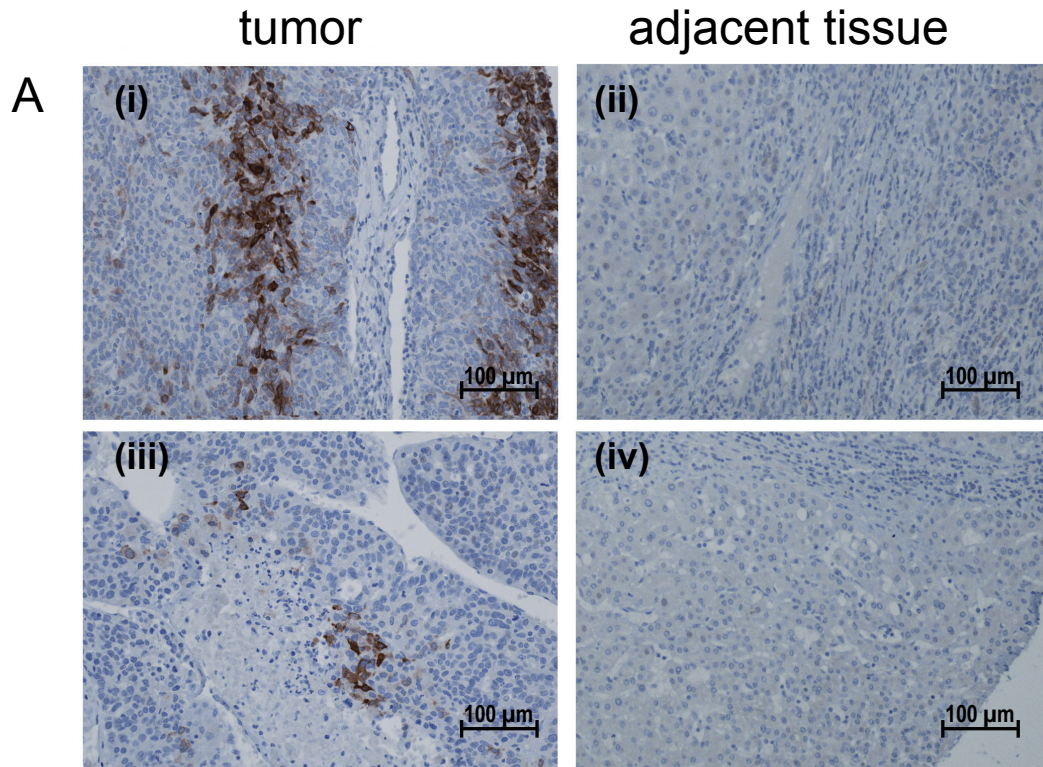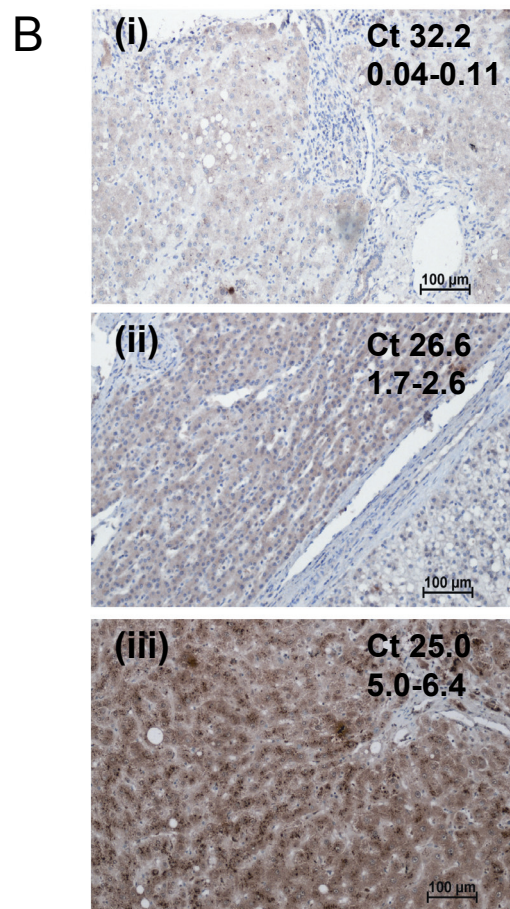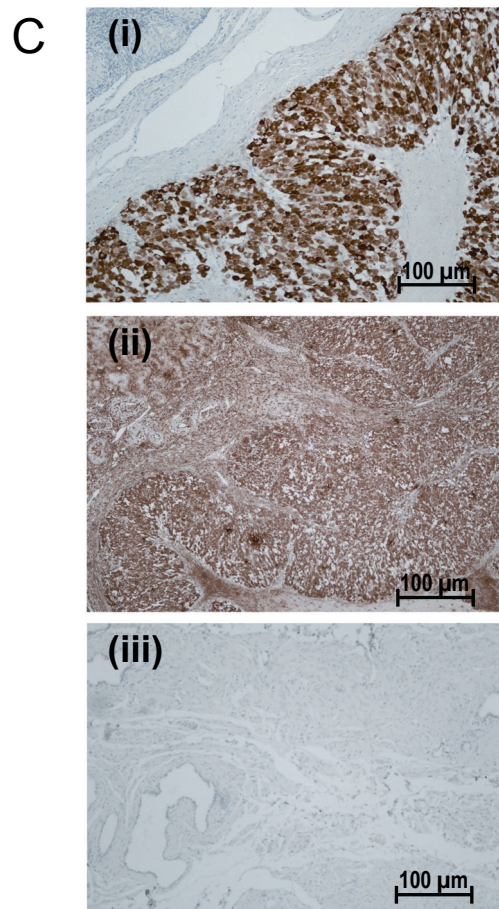

Supplement: bjc201153x1.pdf [file bjc201153x1.pdf]
